# Supplementary material for: A silver NP-dispersed water extract of fly ash as a green and efficient medium for oxidant-free dehydrogenation of benzyl alcohols
Source: Royal Society of Chemistry journal article supplement (doi:10.1039/c7ra12225j), 2018-01-01
Supplement: c7ra12225j1.pdf [file c7ra12225j1.pdf]

## Silver NPs dispersed water extract of fly ash as green and efficient medium for oxidant-free dehydrogenation of benzyl alcohols

Bishal Bhuyan, Arijita Paul, Meghali Devi, Siddhartha Sankar Dhar\*

Department of Chemistry, National Institute of Technology, Silchar, Silchar-788010, Assam, India

\*Corresponding authors. Tel: +91-03842-242915; fax: +91-03842-224797

Email: [ssd\\_iitg@hotmail.com](mailto:ssd_iitg@hotmail.com) (S.S. Dhar)

| Contents                                                      | Page Numbers |
|---------------------------------------------------------------|--------------|
| TEM image of spent catalyst .....                             | S1           |
| Spectral & analytical data of compounds .....                 | S2-S13       |
| Recyclability of the catalytic system comprising Ag@WEFA..... | S13          |

### TEM image of spent catalyst:

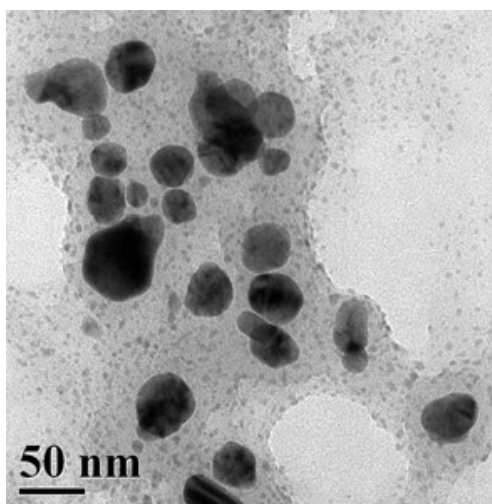

**Fig.S1.** TEM images of the spent Ag@WEFA catalyst

### Spectral & analytical data of compounds:

**(1a) Benzaldehyde:** Colourless liquid;  $^1\text{H}$  NMR (400 MHz,  $\text{CDCl}_3$ )  $\delta$  9.71 (s, 1H), 7.59 (m,  $J=7.4$  Hz, 2H), 7.30 (t, 1H), 7.19 (t, 2H).

**(2a) 4-Methylbenzaldehyde:** Colourless liquid;  $^1\text{H}$  NMR (400 MHz,  $\text{CDCl}_3$ )  $\delta$  9.57 (s, 1H), 7.37 (d,  $J=7.2$  Hz, 2H), 6.87 (d,  $J=7.2$  Hz, 2H), 1.96 (s, 3H).

**(3a) 4-Chlorobenzaldehyde:** Colourless solid; m.p.  $50^\circ\text{C}$ ;  $^1\text{H}$  NMR (400 MHz,  $\text{CDCl}_3$ )  $\delta$  9.98 (s, 1H), 7.83 (d,  $J=7$  Hz, 2H), 7.51 (d,  $J=6.5$  Hz, 2H).

**(4a) 4-Nitrobenzaldehyde:** Pale yellow solid; m.p.  $105^\circ\text{C}$ ;  $^1\text{H}$  NMR (400 MHz,  $\text{CDCl}_3$ )  $\delta$  10.18 (s, 1H), 8.41 (s, 1H), 8.12 (d,  $J=6.5$  Hz, 1H), 8.09 (d,  $J=6.5$  Hz, 1H), 7.30 (t,  $J=6$  Hz, 1H).

**(5a) 4-Hydroxybenzaldehyde:** Colourless solid; m.p.  $112^\circ\text{C}$ ;  $^1\text{H}$  (400 MHz,  $\text{CDCl}_3$ ):  $\delta$  =9.83 (s, 1H), 7.80 (d,  $J=8.4$  Hz, 1H), 6.95 (d,  $J=8.4$  Hz, 1H).

**(6a) 4-Dimethylaminobenzaldehyde:** Yellowish white powder; m.p.  $72^\circ\text{C}$ ;  $^1\text{H}$  (400 MHz,  $\text{CDCl}_3$ ):  $\delta$  = 9.79 (s, 1H), 7.79 (d,  $J=7.5$  Hz, 2H), 6.75 (d,  $J=7.5$  Hz, 2H), 3.12 (s, 6H).

**(7a) 4-methoxy benzaldehyde:** Colourless liquid;  $^1\text{H}$  (400 MHz,  $\text{CDCl}_3$ ):  $\delta$  9.86 (s, 1H), 7.83 (d,  $J=7.0$  Hz, 2H), 7.80 (d,  $J=8.0$  Hz, 2H), 3.92 (s, 3H).

**(8a) 4-Florobenzaldehyde:** Colourless liquid;  $^1\text{H}$  (400 MHz,  $\text{CDCl}_3$ ):  $\delta$  7.19-7.24 (m, 2H), 7.90-7.94 (m,  $J=5.8$  Hz, 2H), 9.97 (s, 1H).

**(9a) 4-Bromobenzaldehyde:** Colourless solid; m.p.  $56-57^\circ\text{C}$ ;  $^1\text{H}$  NMR (400 MHz,  $\text{CDCl}_3$ )  $\delta$  9.98 (s, 1H), 7.76 (d,  $J=6.4$  Hz, 2H), 7.70 (d,  $J=6.4$  Hz, 2H).

**(10a) 3-Chlorobenzaldehyde:** Colourless liquid;  $^1\text{H}$  NMR ( $\text{CDCl}_3$ )  $\delta$  9.93 (s, 1H) 7.76 (s, 1H), 7.72 (d,  $J=6.5$  Hz, 1H), 7.50 (d,  $J=7.0$  Hz, 1H), 7.42 (d,  $J=6.5$  Hz, 1H).

**(11a) 3-Bromobenzaldehyde:** Yellow liquid;  $^1\text{H NMR}$  (400MHz,  $\text{CDCl}_3$ )  $\delta=9.96$  (s, 1H), 7.61 (s, 1H), 7.50 (d,  $J = 7.5$  Hz, 1H), 7.38 (d,  $J = 7.0$  Hz, 1H), 7.11 (d,  $J = 7.5$  Hz, 1H).

**(12a) 3-Nitrobenzaldehyde:** Yellow solid; m.p.  $58^\circ\text{C}$ ;  $^1\text{H NMR}$  ( $\text{CDCl}_3$ )  $\delta$  10.13 (s, 1H), 8.71 (s, 1H), 8.49 (d,  $J = 7.5$  Hz, 1H), 8.25 (d,  $J = 7.5$  Hz, 1H), 7.80 (t,  $J = 7.5$  Hz, 1H).

**(13a) 2-Chlorobenzaldehyde:** Colorless liquid;  $^1\text{H NMR}$  (400MHz,  $\text{CDCl}_3$ )  $\delta$  10.33 (s, 1H), 7.78 (m, 1H), 7.75 (m, 1H), 7.34 (m, 1H), 7.27 (m, 1H).

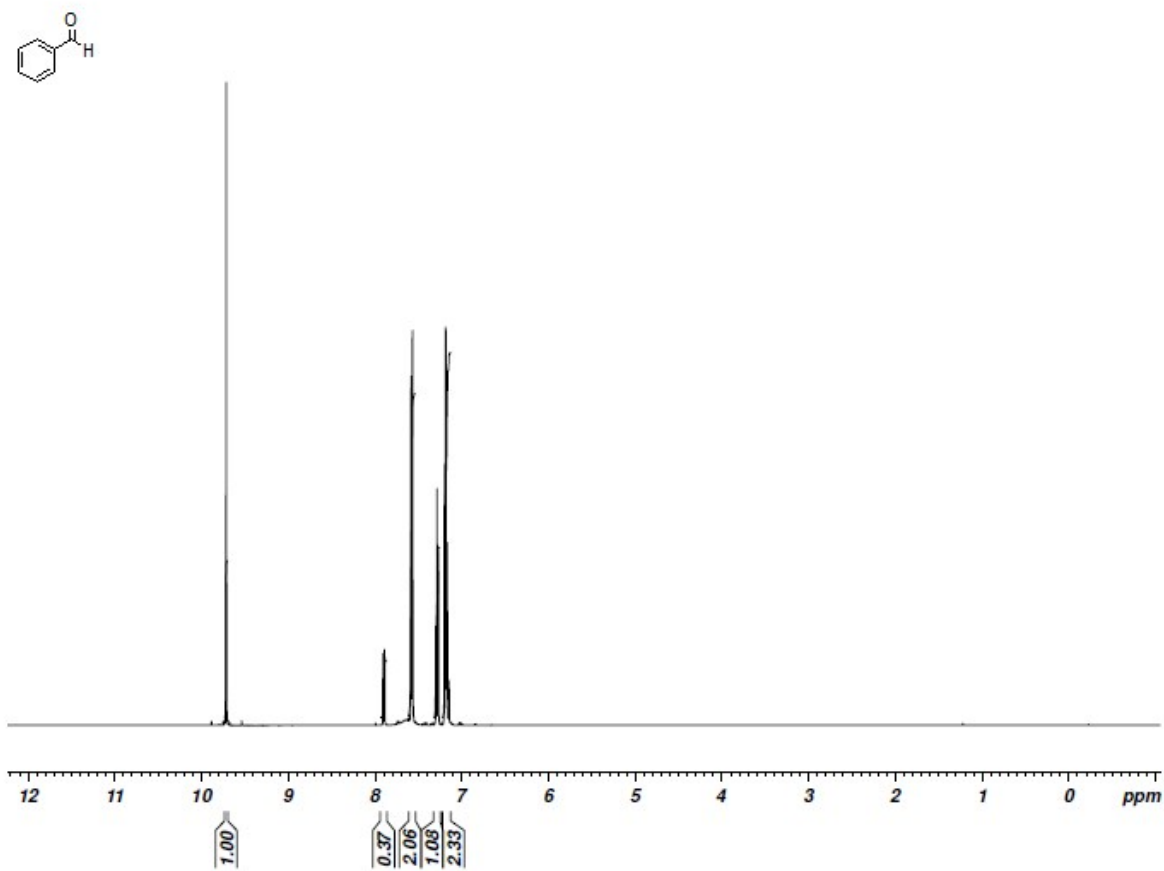

**Fig.S2.**  $^1\text{H NMR}$  spectrum of compound (1a) in  $\text{CDCl}_3$ .

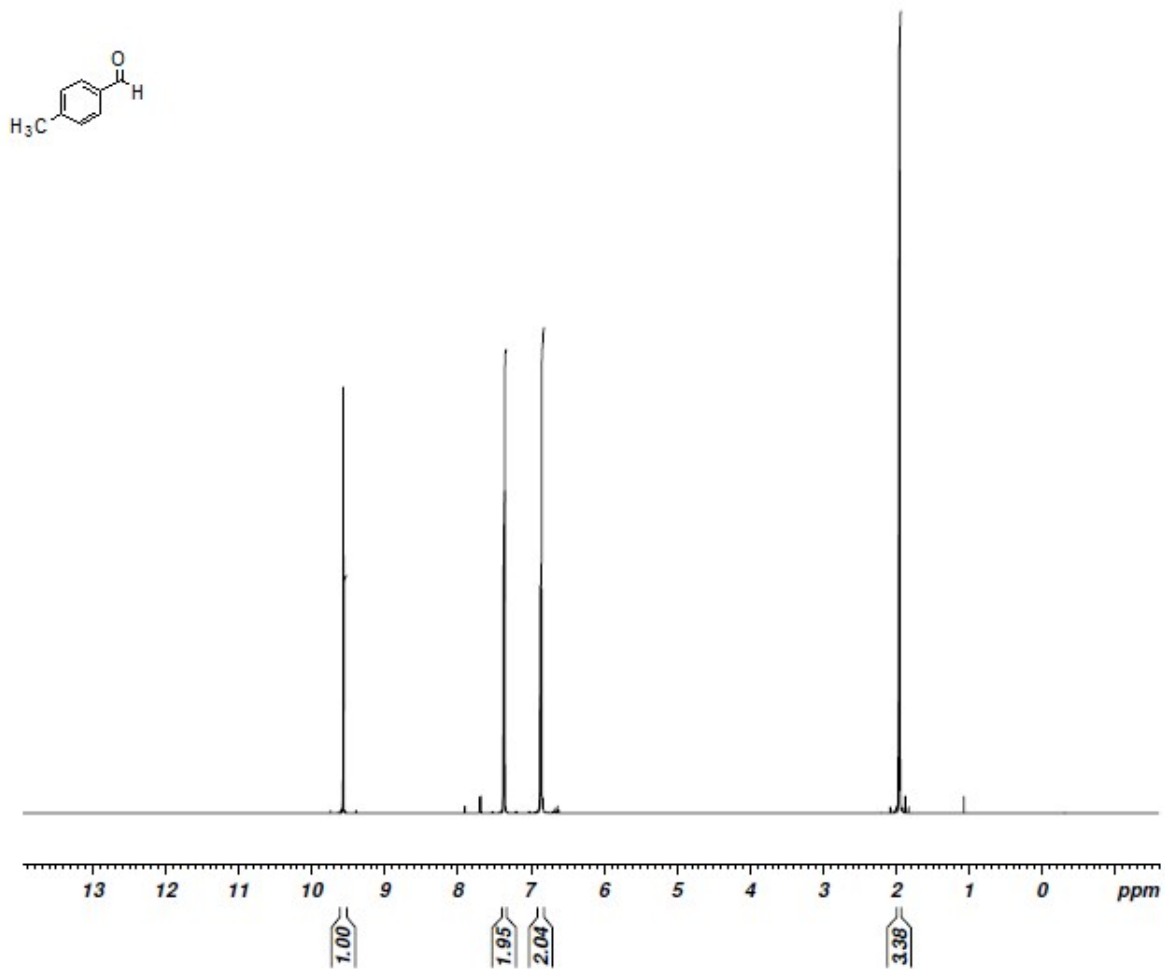

**Fig.S3.** <sup>1</sup>H NMR spectrum of compound (2a) in CDCl<sub>3</sub>.

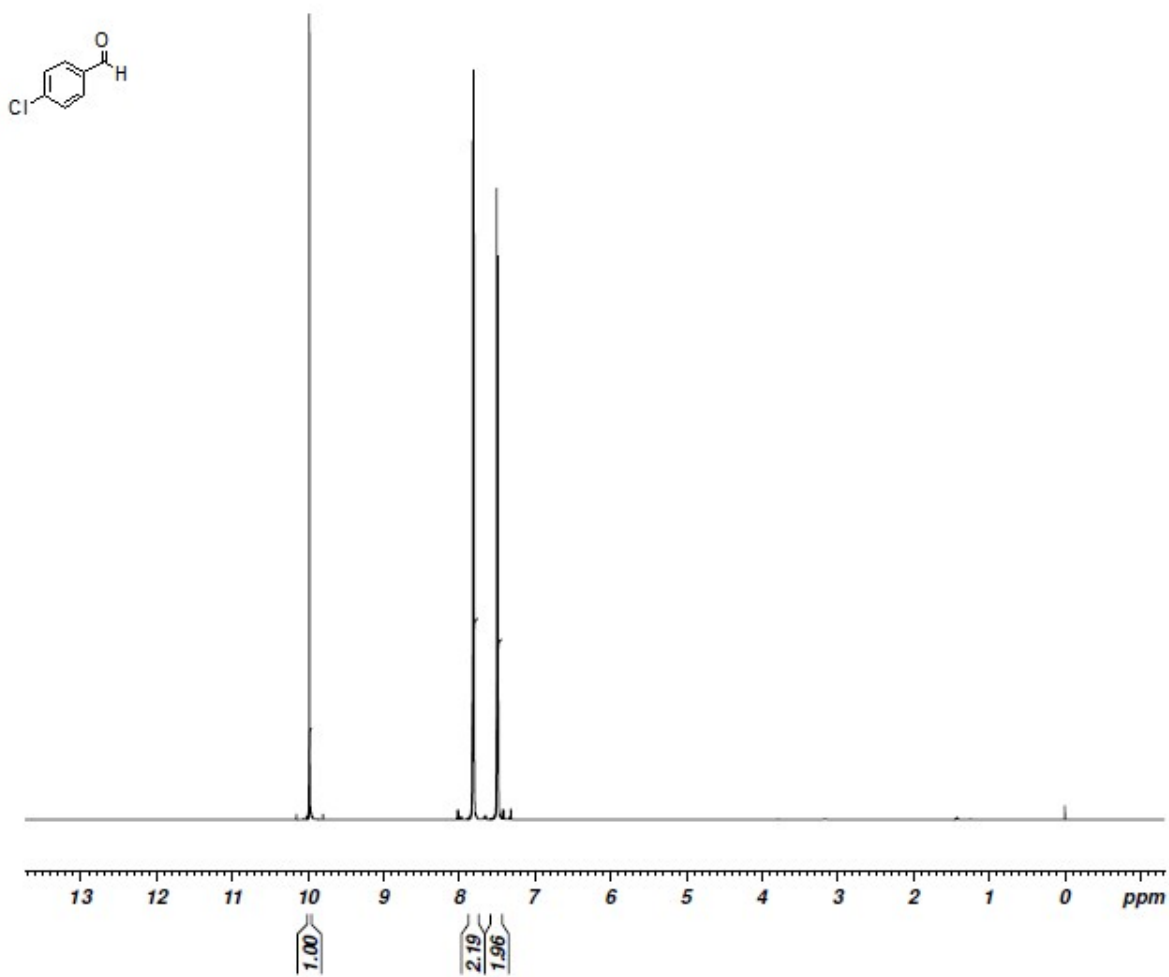

**Fig.S4.** <sup>1</sup>H NMR spectrum of compound (3a) in CDCl<sub>3</sub>.

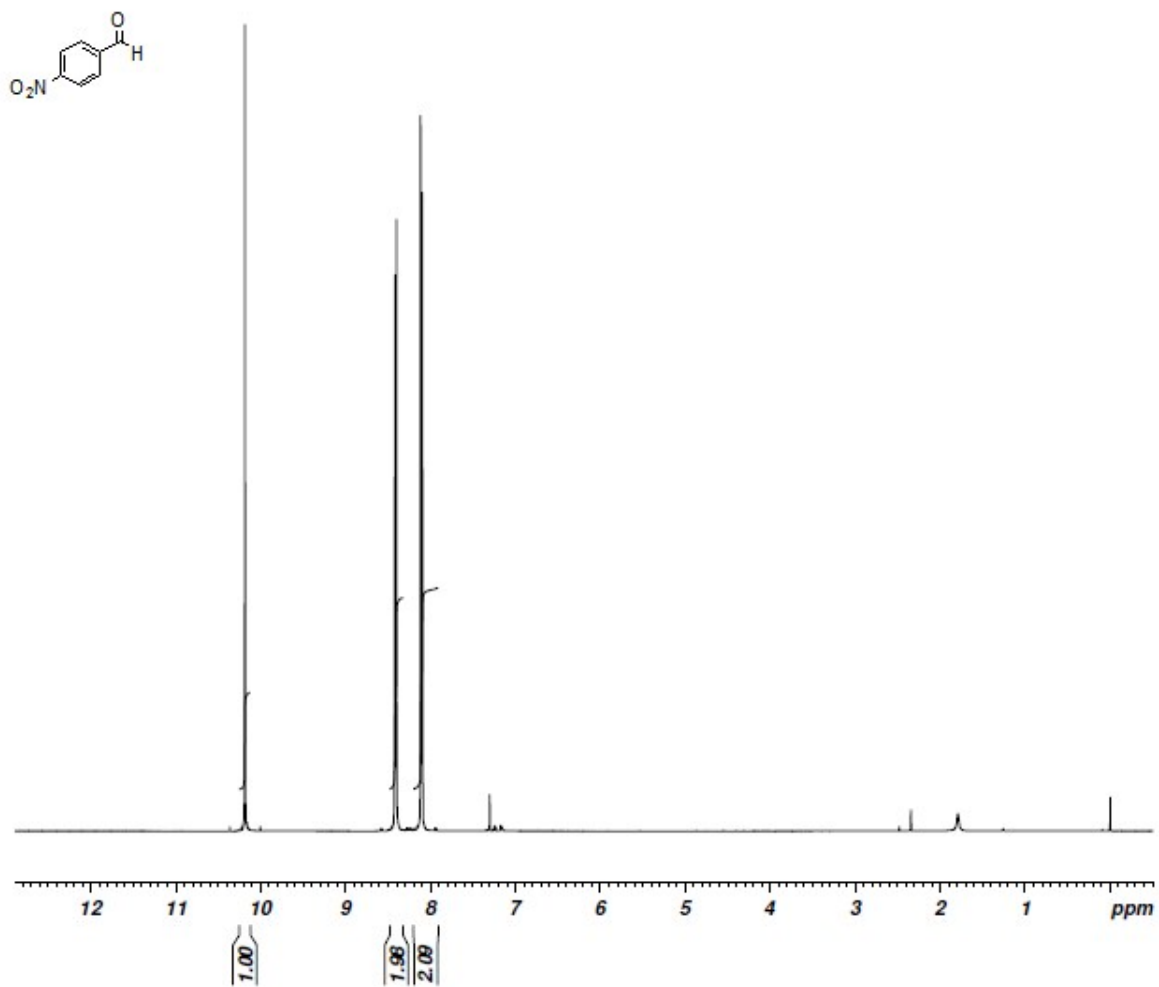

**Fig.S5.**  $^1\text{H}$  NMR spectrum of compound (4a) in  $\text{CDCl}_3$ .

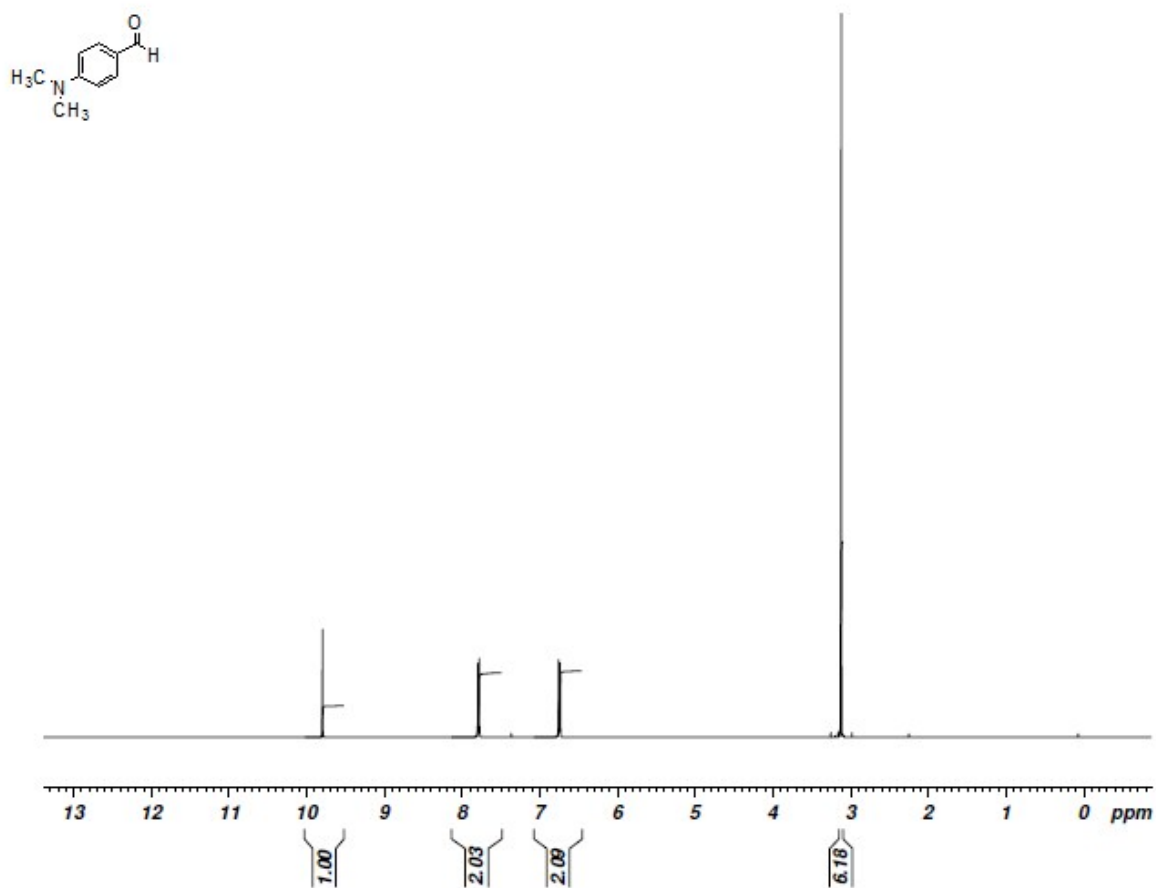

**Fig.S6.** <sup>1</sup>H NMR spectrum of compound (6a) in CDCl<sub>3</sub>.

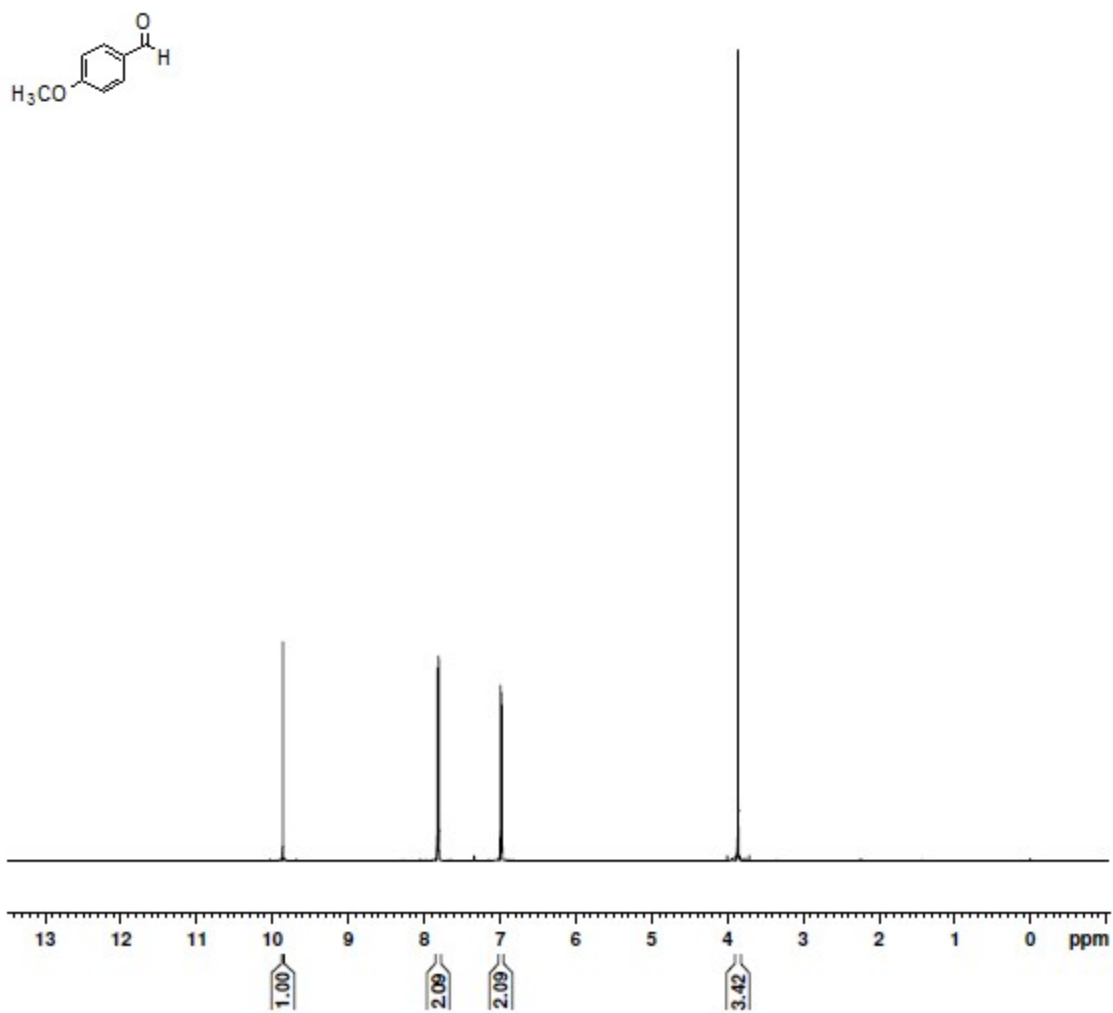

Fig.S7. <sup>1</sup>H NMR spectrum of compound (7a) in CDCl<sub>3</sub>.



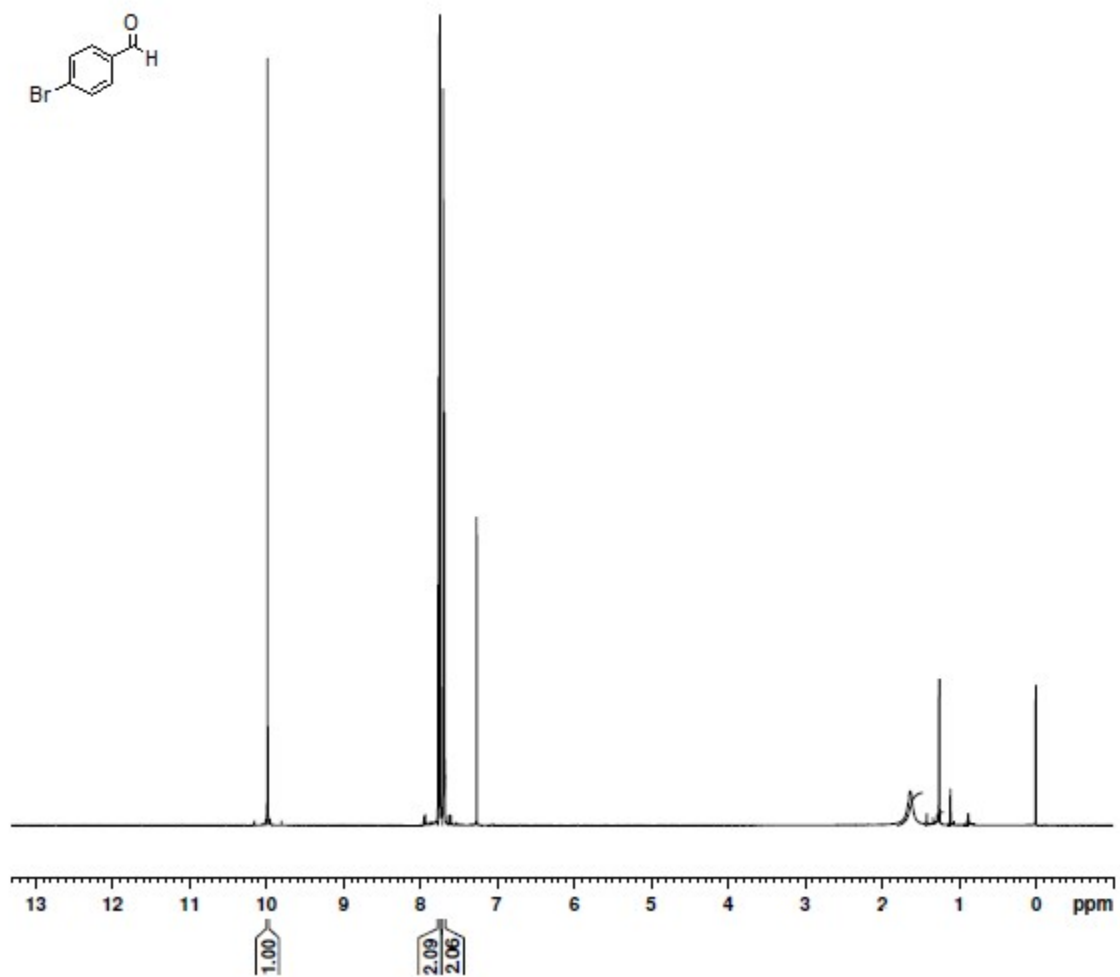

**Fig.S8.** <sup>1</sup>H NMR spectrum of compound (9a) in CDCl<sub>3</sub>.

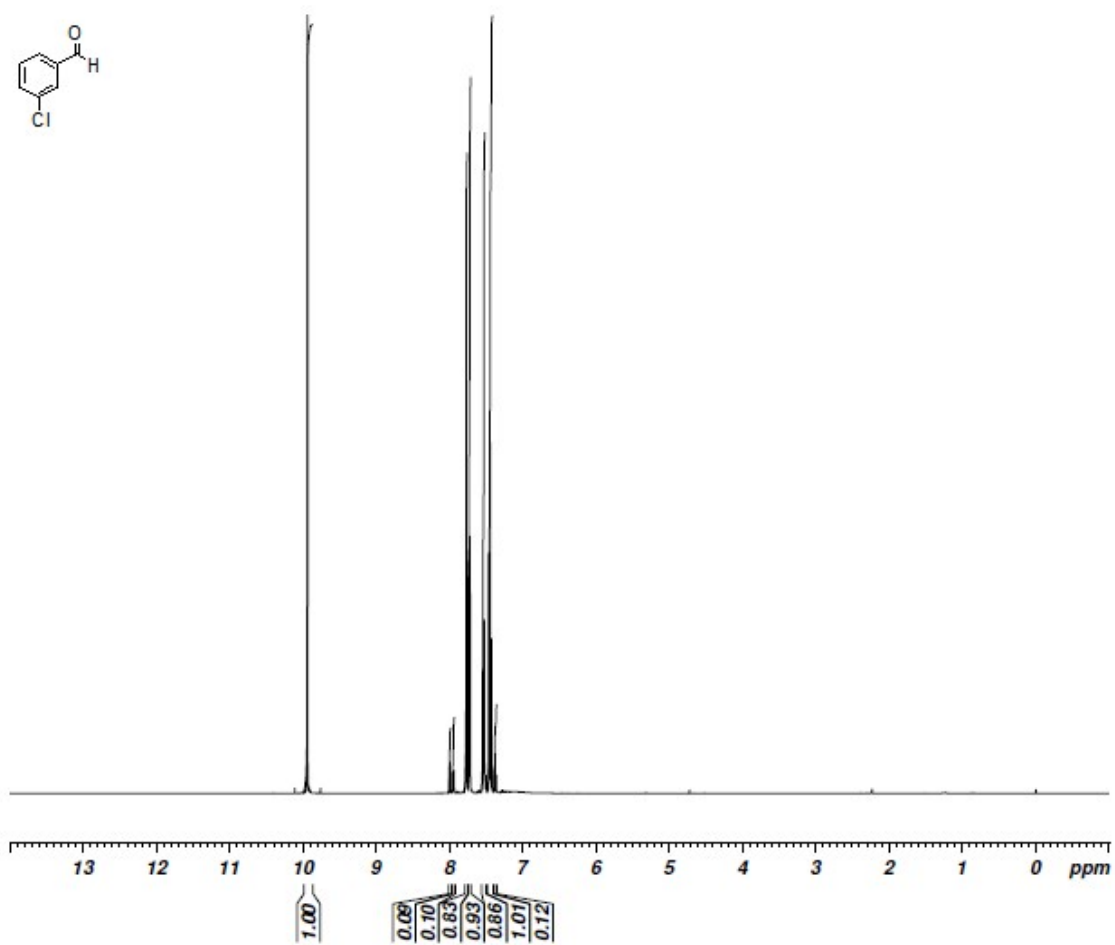

**Fig.S9.** <sup>1</sup>H NMR spectrum of compound (10a) in CDCl<sub>3</sub>.

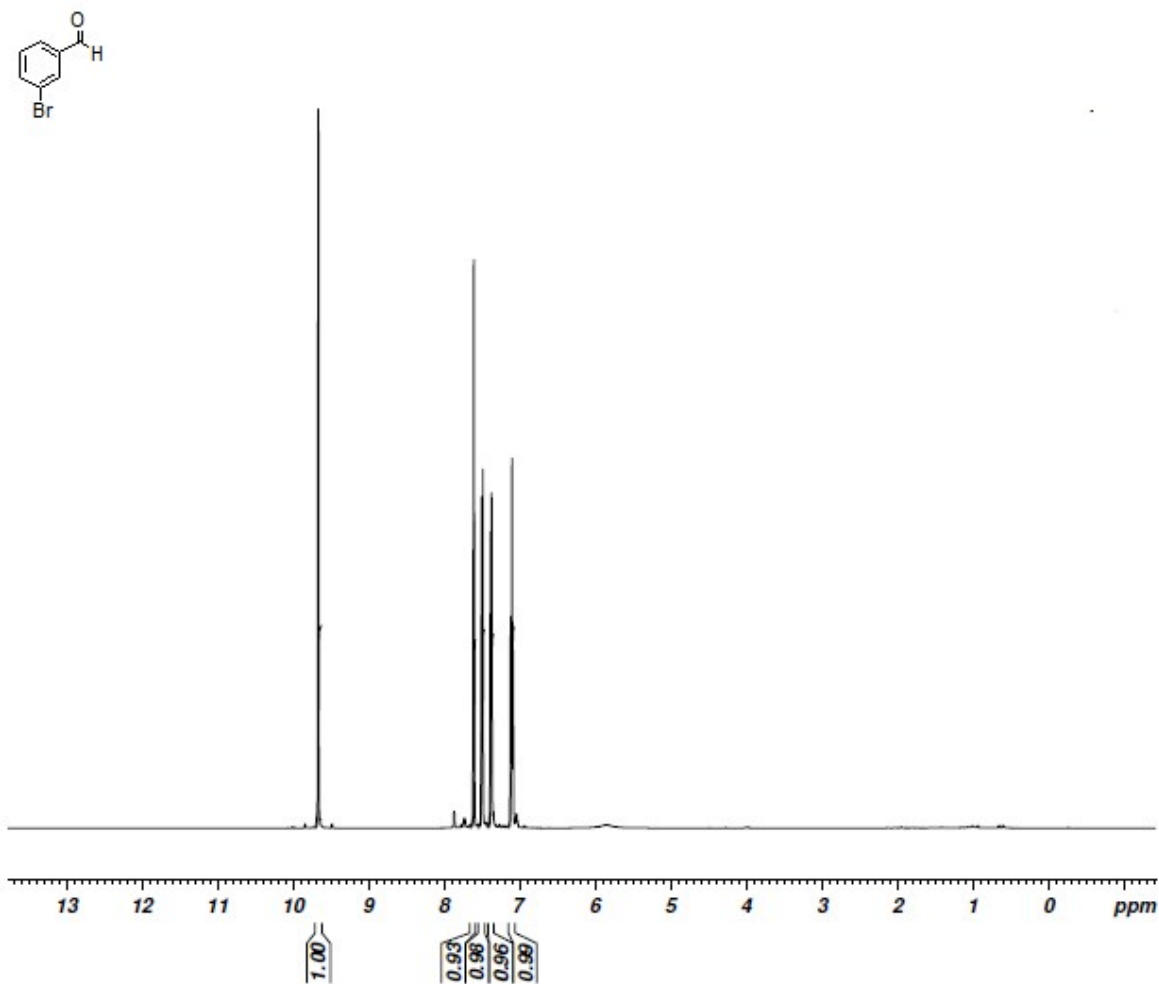

**Fig.S10.** <sup>1</sup>H NMR spectrum of compound (11a) in CDCl<sub>3</sub>.

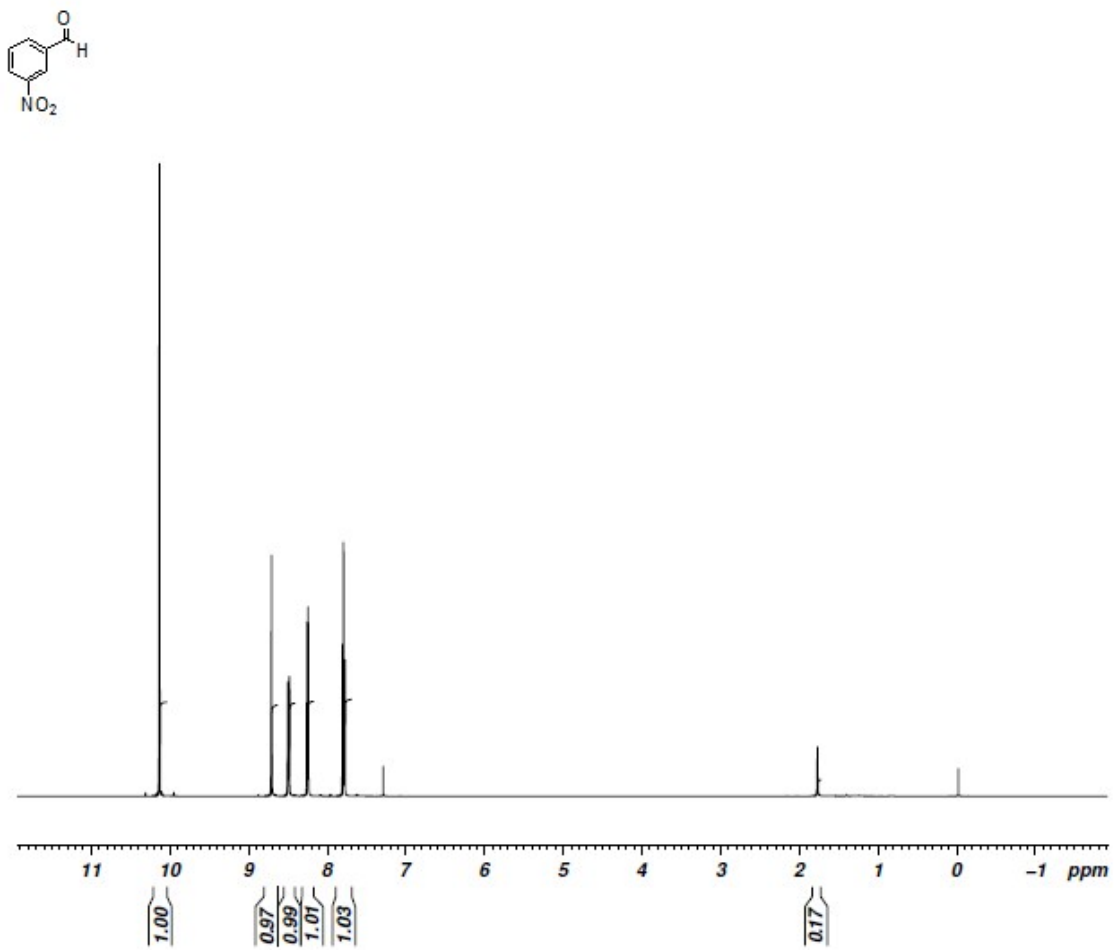

**Fig.S11.** <sup>1</sup>H NMR spectrum of compound (12a) in CDCl<sub>3</sub>.

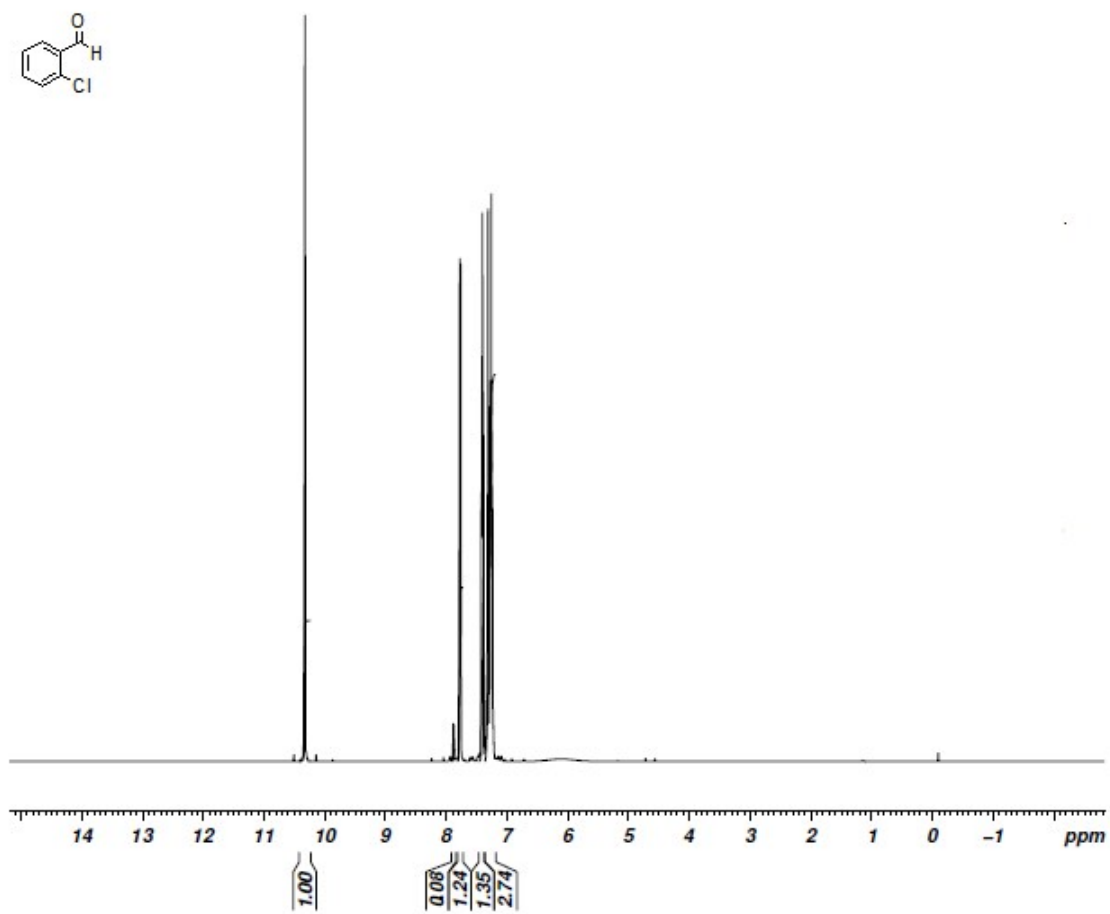

**Fig.S12.**  $^1\text{H}$  NMR spectrum of compound (13a) in  $\text{CDCl}_3$ .

**Table.S1: Recyclability of the catalytic system comprising Ag@WEFA**

| Entry | Run             | Time (h) | Yield (%) |
|-------|-----------------|----------|-----------|
| 1     | 1 <sup>st</sup> | 3        | 96        |
| 2     | 2 <sup>nd</sup> | 3        | 94        |
| 3     | 3 <sup>rd</sup> | 3.5      | 93        |
| 4     | 4 <sup>th</sup> | 3.5      | 92        |
| 5     | 5 <sup>th</sup> | 4        | 90        |

**Reaction conditions:** 4-methylbenzyl alcohol (1 mmol), Ag@WEFA (3 mL), reaction temperature 70 °C,  $\text{N}_2$  atmosphere
